# Supplementary material for: The one-step electrodeposition of nickel phosphide for enhanced supercapacitive performance using 3-mercaptopropionic acid
Source: Royal Society of Chemistry journal article supplement (doi:10.1039/d0nj00367k), 2020-01-01
Supplement: d0nj00367k1.pdf [file d0nj00367k1.pdf]

## One-step electrodeposition of nickel phosphide for enhanced supercapacitive performance using 3-mercaptopropionic acid

Venkata Thulasivarma Chebrolu,<sup>a</sup> Balamuralitharan Balakrishnan,<sup>b</sup> Aravindhha Raja Selvaraj,

<sup>a</sup>Inho Cho, <sup>a</sup>Jin-Soo Bak, <sup>a</sup>Hee-Je Kim, <sup>a\*</sup>

Department of Electrical Engineering, Pusan National University, Gumjeong-Ku, Jangjeong-Dong, Busan 46241, Republic of Korea.

Department of Electronics and Communication Engineering, Vel Tech Rangarajan Dr. Sagunthala R&D Institute of Science and Technology, Chennai – 600062, Tamil Nadu, India.

†Electronic supplementary information (ESI) available:

\*Corresponding author. Tel: +82-10-2295-0613; fax: +82-51-5130212.

E-mail address: [heeje@pusan.ac.kr](mailto:heeje@pusan.ac.kr)

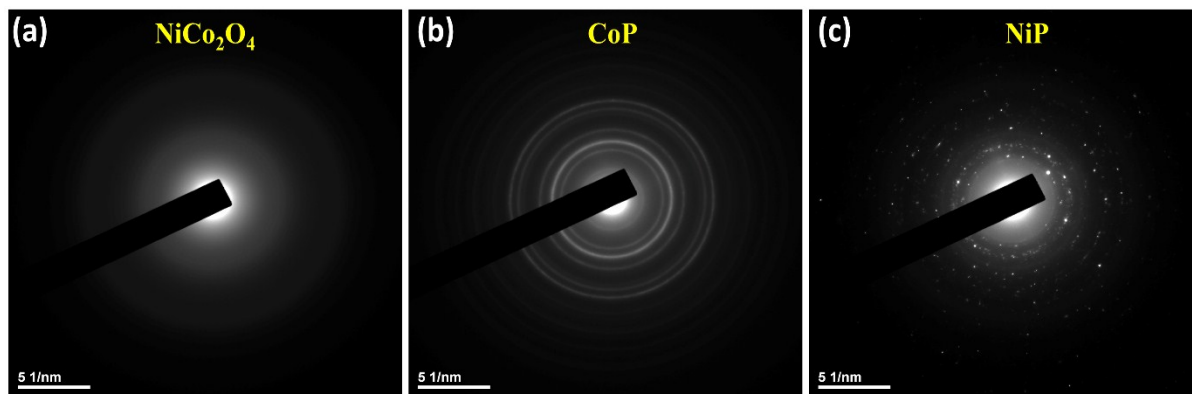

**Fig. S1.** Selected area electron diffraction (SAED) patterns of NiCo<sub>2</sub>O<sub>4</sub>, CoP, and NiP via electrodeposition technique.

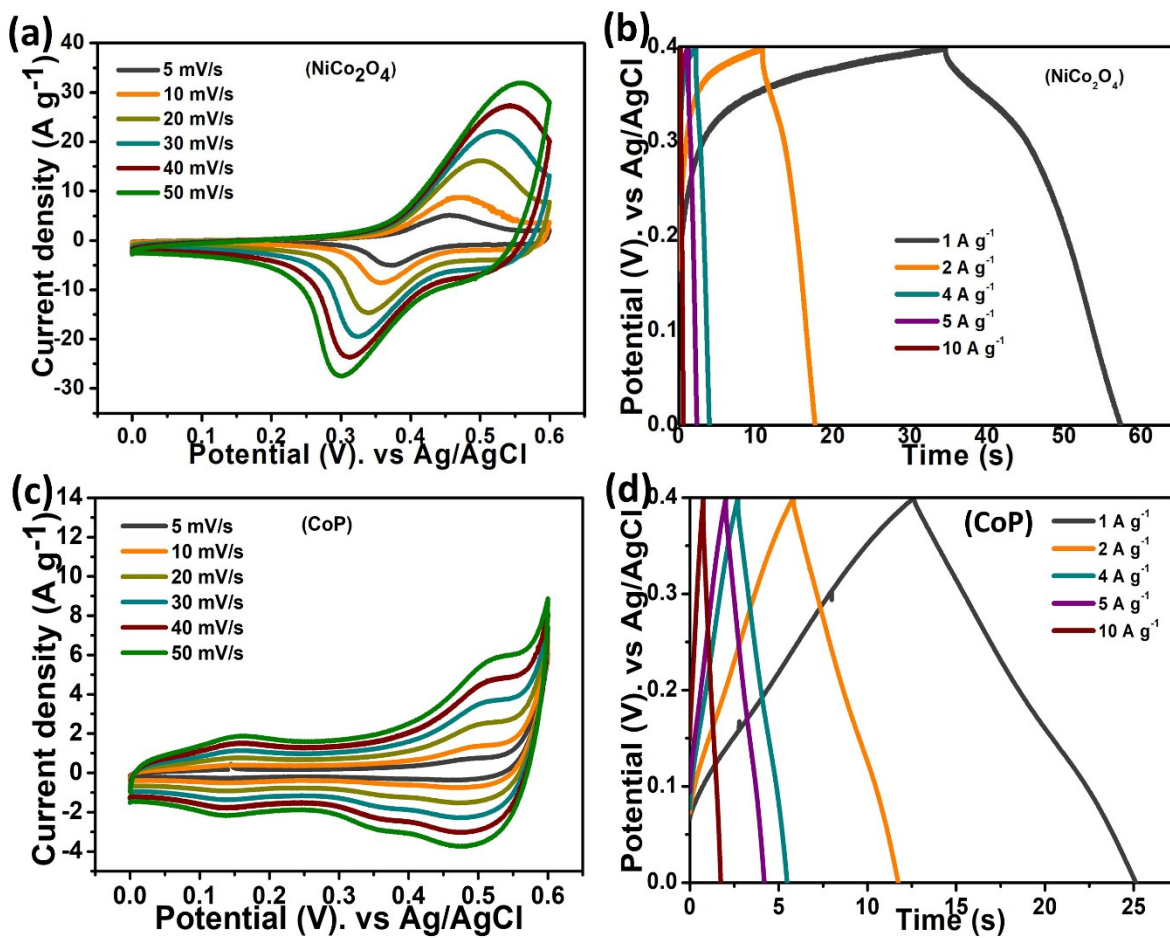

Fig. S2. CV and GCD plot of nickel cobalt oxide (NiCo<sub>2</sub>O<sub>4</sub>) and cobalt phosphide (CoP) at different scan rates and current densities.

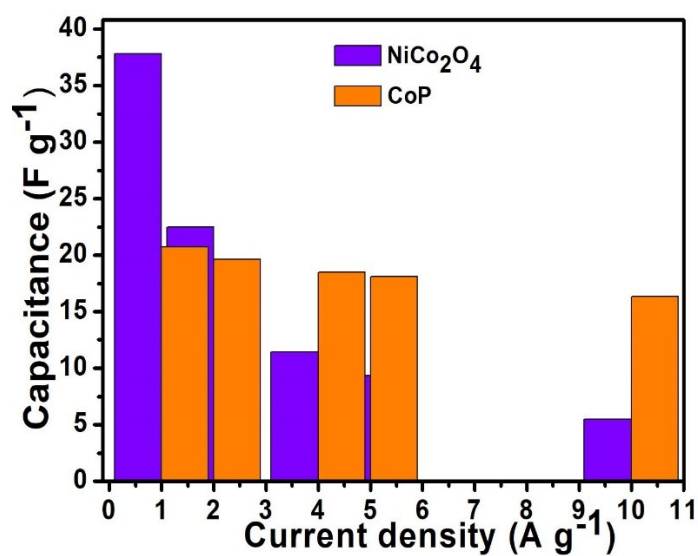

Fig. S3. NiCo<sub>2</sub>O<sub>4</sub> and CoP specific capacitance vs current density of NiCo<sub>2</sub>O<sub>4</sub> and CoP at various current densities.
